# Supplementary material for: Binding of α-synuclein oligomers to Cx32 facilitates protein uptake and transfer in neurons and oligodendrocytes
Source: PubMed Central journal article supplement (PMC6570706; doi:10.1007/s00401-019-02007-x), 2019-04-11
Supplement: 401_2019_2007_MOESM1_ESM.pdf [file 401_2019_2007_MOESM1_ESM.pdf]

**Table S3. Primary antibodies, primers and gRNA sequences used in this study**

| <b>Antibodies/Genes</b>                        | <b>Company/ ID</b>                            | <b>Dilution</b>              |
|------------------------------------------------|-----------------------------------------------|------------------------------|
| CNPase antibody<br>(Mouse, Rabbit)             | Invitrogen: PA5-29345<br>Sigma: SAB4200693    | IHC, 1/250<br>IHC, 1/250     |
| Cx32 antibody (Mouse)                          | Millipore: MAB3069                            | WB, 1/1000<br>IHC, 1/250     |
| Cx32 antibody (Rabbit)                         | Thermo Scientific: 71-0600                    | IHC, 1/250                   |
| Cx32 antibody: (Mouse)                         | Abcam: 66613                                  | WB, 1/1000<br>IHC, 1/250     |
| $\alpha$ -syn antibody: (Rabbit)               | Invitrogen: 701085                            | WB, 1/20,000<br>IHC, 1/5,000 |
| pS129 $\alpha$ -syn antibody<br>(Mouse)        | Wako: 015-25191                               | IHC, 1/1,000                 |
| GAPDH antibody:<br>(Mouse)                     | Novus Biologicals: 2D4A7                      | WB, 1/10,000                 |
| $\beta$ 3-tubulin antibody:<br>(Mouse, Rabbit) | Sigma Aldrich: Tuj1<br>Biolegend: (Poly18020) | IHC, 1/1,000                 |
| $\beta$ -actin antibody: (Mouse)               | Sigma Aldrich: AC-15                          | WB, 1/10,000                 |
| mCherry antibody:<br>(Rabbit)                  | Invitrogen: PA5-34974                         | WB, 1/1000<br>IHC, 1/250     |
| A $\beta$ antibody: (Mouse)                    | Biolegend: 6E10                               | WB, 1/1000<br>IHC, 1/250     |
| MBP: (Mouse)                                   | Santa Cruz Biotechnology: 271524              | IHC, 1/250                   |
| GJA1                                           | Hs00748445                                    |                              |
| GJA1                                           | Mm00439105                                    |                              |
| GAPDH                                          | Hs03929097                                    |                              |
| GAPDH                                          | Mm99999915                                    |                              |
| GJB1                                           | Hs00939759                                    |                              |
| GJB1                                           | Ms00439759                                    |                              |
| SNCA                                           | Hs01103383                                    |                              |
| CRISPR gRNA sequence                           | GTGGACCTATGTCATCAGCG                          | Pam: TGG                     |
