# Supplementary material for: Binding of α-synuclein oligomers to Cx32 facilitates protein uptake and transfer in neurons and oligodendrocytes
Source: PubMed Central journal article supplement (PMC6570706; doi:10.1007/s00401-019-02007-x), 2019-04-11
Supplement: 401_2019_2007_MOESM2_ESM.pdf [file 401_2019_2007_MOESM2_ESM.pdf]

**Table S1. Transgenic animal models used in this study**

| <b>Line</b> | <b>Age (months)</b> | <b>Sex</b> |
|-------------|---------------------|------------|
| L61         | 6M                  | M          |
| L61         | 6 M                 | M          |
| L61         | 6M                  | M          |
| L61         | 6 M                 | M          |
| L61         | 6M                  | M          |
| A30P        | 18                  | M          |
| A30P        | 18                  | M          |
| A30P        | 17.5                | M          |
| A30P        | 18                  | F          |
| A30P        | 18                  | F          |
| A30P        | 18                  | F          |
| MBP-29      | 1 M                 | M          |
| MBP-29      | 1 M                 | M          |
| MBP-29      | 1 M                 | M          |
| MBP-29      | 1 M                 | M          |
| MBP-29      | 1 M                 | M          |
| MBP-29      | 3 M                 | M          |
| MBP-29      | 3 M                 | M          |
| MBP-29      | 3 M                 | M          |
| MBP-29      | 3 M                 | M          |
| MBP-29      | 3 M                 | M          |
