# Supplementary material for: Binding of α-synuclein oligomers to Cx32 facilitates protein uptake and transfer in neurons and oligodendrocytes
Source: PubMed Central journal article supplement (PMC6570706; doi:10.1007/s00401-019-02007-x), 2019-04-11
Supplement: 401_2019_2007_MOESM3_ESM.pdf [file 401_2019_2007_MOESM3_ESM.pdf]

**Table S2. Demographics of human brain samples of PD, MSA and control cases used for this study**

| Diagnosis                     | Age of Death | Gender | PMD  | Age at diagnosis | Region analyzed | ID #      |
|-------------------------------|--------------|--------|------|------------------|-----------------|-----------|
| Control                       | 80           | M      | 25   | NA               | Putamen/nigra   | 56490     |
| Control                       | 73           | M      | 14   | NA               | Putamen/nigra   | 18589     |
| Control                       | 70           | F      | 32   | NA               | Putamen/nigra   | 16391     |
| Control                       | 77           | M      | 22   | NA               | Putamen/nigra   | 74890     |
| PD, mild AD, Congo Angiopathy | 80           | F      | 14   | 69               | Putamen/nigra   | 12595     |
| PD, LBD                       | 70           | M      | 7.5  | PD-64, AD-69     | Putamen/nigra   | 6013      |
| PD                            | 78           | M      | 16   | 66               | Putamen/nigra   | 7815      |
| PD                            | 75           | M      | 28   | 63               | Putamen/nigra   | 64891     |
| Control                       | 82           | F      | 43   | N/A              | Cortex          | A011/06   |
| Control                       | 87           | F      | 21.5 | N/A              | Cortex          | A047/02   |
| Control                       | 81           | M      | 42   | N/A              | Cortex          | A048/09   |
| Control                       | 79           | M      | 34   | N/A              | Cortex          | A049/03   |
| Control                       | 90           | F      | 74   | N/A              | Cortex          | A063/10   |
| Control                       | 85           | M      | 48   | N/A              | Cortex          | A133/95   |
| Control                       | 86           | M      | 6    | N/A              | Cortex          | A134/00   |
| Control                       | 89           | F      | 65   | N/A              | Cortex          | A136/10   |
| Control                       | 71           | M      | 5    | N/A              | Cortex          | A153/01   |
| Control                       | 68           | F      | 9    | N/A              | Cortex          | A170/00   |
| Control                       | 80           | M      | 48   | N/A              | Cortex          | A185/04   |
| Control                       | 80           | M      | 11   | N/A              | Cortex          | A223/96   |
| Control                       | 79           | F      | 38   | N/A              | Cortex          | A239/95   |
| Control                       | 77           | M      | 29   | N/A              | Cortex          | A283/96   |
| Control                       | 66           | M      | 52   | N/A              | Cortex          | A308/09   |
| Control                       | 80           | M      | 35   | N/A              | Cortex          | A316/95   |
| Control                       | 77           | M      | 96   | N/A              | Cortex          | A320/94   |
| Control                       | 96           | F      | 72   | N/A              | Cortex          | A33/96    |
| Control                       | 85           | M      | 16   | N/A              | Cortex          | A346/95   |
| Control                       | 80           | F      | 22   | N/A              | Cortex          | A359/08   |
| Control                       | 85           | M      | 42   | N/A              | Cortex          | A401/97   |
| Control                       | 65           | M      | 29   | N/A              | Cortex          | A61/96    |
| PD                            | 62           | F      | 41   | N/A              | Cortex          | BBN_15746 |
| PD                            | 89           | F      | 54   | N/A              | Cortex          | BBN_15613 |
| PD                            | 69           | F      | 34   | N/A              | Cortex          | BBN_16484 |
| PD                            | 85           | F      | 9    | N/A              | Cortex          | BBN_15696 |
| PD                            | 73           | M      | 40   | N/A              | Cortex          | BBN_16602 |

|                  |                     |            |            |                         |                        |             |
|------------------|---------------------|------------|------------|-------------------------|------------------------|-------------|
| PD               | 76                  | M          | 66         | N/A                     | Cortex                 | BBN_16605   |
| PD               | 72                  | M          | 29         | N/A                     | Cortex                 | BBN_16638   |
| PD               | 80                  | F          | 72         | N/A                     | Cortex                 | BBN_16644   |
| PD               | 79                  | M          | 89         | N/A                     | Cortex                 | BBN_16657   |
| PD               | 59                  | M          | 23         | N/A                     | Cortex                 | BBN_16661   |
| PD               | 74                  | M          | 10         | N/A                     | Cortex                 | BBN_16683   |
| PD               | 84                  | M          | 34         | N/A                     | Cortex                 | BBN_15702   |
| PD               | 81                  | F          | 38         | N/A                     | Cortex                 | BBN_16754   |
| PD               | 73                  | F          | 82         | N/A                     | Cortex                 | BBN_16797   |
| PD               | 76                  | F          | 47         | N/A                     | Cortex                 | BBN_16854   |
| PD               | 70                  | M          | 49         | N/A                     | Cortex                 | BBN_16856   |
| PD               | 75                  | M          | 40         | N/A                     | Cortex                 | BBN_16917   |
|                  |                     |            |            |                         |                        |             |
| <b>Diagnosis</b> | <b>Age of death</b> | <b>Sex</b> | <b>PMD</b> | <b>Age at diagnosis</b> | <b>Region analyzed</b> | <b>ID #</b> |
| Control          | 55                  | F          | 5.35       | N/A                     | Putamen                | N/A         |
| Control          | 60                  | F          | 7.3        | N/A                     | Putamen                | N/A         |
| Control          | 64                  | F          | 5.4        | N/A                     | Putamen                | N/A         |
| Control          | 51                  | M          | 7.45       | N/A                     | Putamen                | N/A         |
| Control          | 55                  | M          | 7.15       | N/A                     | Putamen                | N/A         |
| MSA              | 66                  | F          | 8.05       | N/A                     | Putamen                | N/A         |
| MSA              | 67                  | F          | 7.15       | N/A                     | Putamen                | N/A         |
| MSA              | 59                  | F          | 6.4        | N/A                     | Putamen                | N/A         |
| MSA              | 55                  | M          | 8.4        | N/A                     | Putamen                | N/A         |
| MSA              | 67                  | M          | 6.1        | N/A                     | Putamen                | N/A         |
